# Supplementary material for: Cationic ring-opening polymerization of a five membered cyclic dithiocarbonate having a tertiary amine moiety
Source: Royal Society of Chemistry journal article supplement (doi:10.1039/d1py01230d), 2021-12-14
Supplement: d1py01230d1.pdf [file d1py01230d1.pdf]

SUPPORTING INFORMATION

**Cationic Ring Opening Polymerization Of Five Membered Cyclic Dithiocarbonate Having Tertiary Amine Moiety**

Suvratha Krishnamurthy<sup>a</sup>, Yoshiaki Yoshida<sup>a,b</sup> and Takeshi Endo<sup>\*a</sup>

<sup>a</sup> Molecular Engineering Institute, Kyushu Institute of Technology, 1-1 Sensui-cho, Tobata-ku, Kitakyushu-shi, Fukuoka, 804-8550, Japan

<sup>b</sup> Faculty of Engineering, Department of Materials Science, Kyushu Institute of Technology, 1-1, Sensui-cho, Tobata-ku, Kitakyushu-shi 804-8550, Japan

Correspondence to: Takeshi Endo (E - mail: [endo.takeshi328@mail.kyutech.jp](mailto:endo.takeshi328@mail.kyutech.jp))

Contents

|     |                                                                                                                                          |
|-----|------------------------------------------------------------------------------------------------------------------------------------------|
| S2  | <sup>1</sup> H and <sup>13</sup> C NMR of <i>N, N</i> -dibenzyl glycidylamine (DBGA)                                                     |
| S3  | <sup>1</sup> H and <sup>13</sup> C NMR of 5-((dibenzylamino)methyl)-1,3-oxathiolane-2-thione (1)                                         |
| S4  | <sup>1</sup> H and <sup>13</sup> C NMR of 5-((diethylamino)methyl)-1,3-oxathiolane-2-thione (4)                                          |
| S5  | <sup>1</sup> H and <sup>13</sup> C NMR of Poly-1                                                                                         |
| S6  | DEPT-135 of Poly-1                                                                                                                       |
| S7  | <sup>1</sup> H and <sup>13</sup> C NMR of polymerization solution of 5-((diethylamino)methyl)-1,3-oxathiolane-2-thione (4)               |
| S8  | DEPT-135 of polymerization solution of 5-((diethylamino)methyl)-1,3-oxathiolane-2-thione (4)                                             |
| S9  | <sup>1</sup> H and <sup>13</sup> C NMR of stoichiometric reaction of 1 and MeOTf                                                         |
| S10 | <sup>1</sup> H and <sup>13</sup> C NMR <i>N, N, N</i> -tribenzyl- <i>N</i> -methyl ammonium triflate                                     |
| S11 | <sup>1</sup> H and <sup>13</sup> C NMR <i>N, N, N</i> -triethyl- <i>N</i> -methyl ammonium triflate                                      |
| S12 | Mass Spectra of 5-((dibenzylamino)methyl)-1,3-oxathiolane-2-thione (1) and 5-((diethylamino)methyl)-1,3-oxathiolane-2-thione (4)         |
| S13 | IR spectra of 5-((dibenzylamino)methyl)-1,3-oxathiolane-2-thione (1) and Poly-1                                                          |
| S14 | IR spectra of 5-((diethylamino)methyl)-1,3-oxathiolane-2-thione (4)                                                                      |
| S15 | TGA and DSC profile of Poly-1                                                                                                            |
| S16 | Table 1 of XRC analysis                                                                                                                  |
| S17 | Time-Conversion study of Cationic Polymerization of 5-((dibenzylamino)methyl)-1,3-oxathiolane-2-thione (1) to Poly-1 at room temperature |
| S18 | SEC profiles before and after the post-polymerization experiment of 5-((dibenzylamino)methyl)-1,3-oxathiolane-2-thione (1) to Poly-1     |

Fig-S1. <sup>1</sup>H NMR of *N,N*-dibenzyl glycidylamine (DBGA)

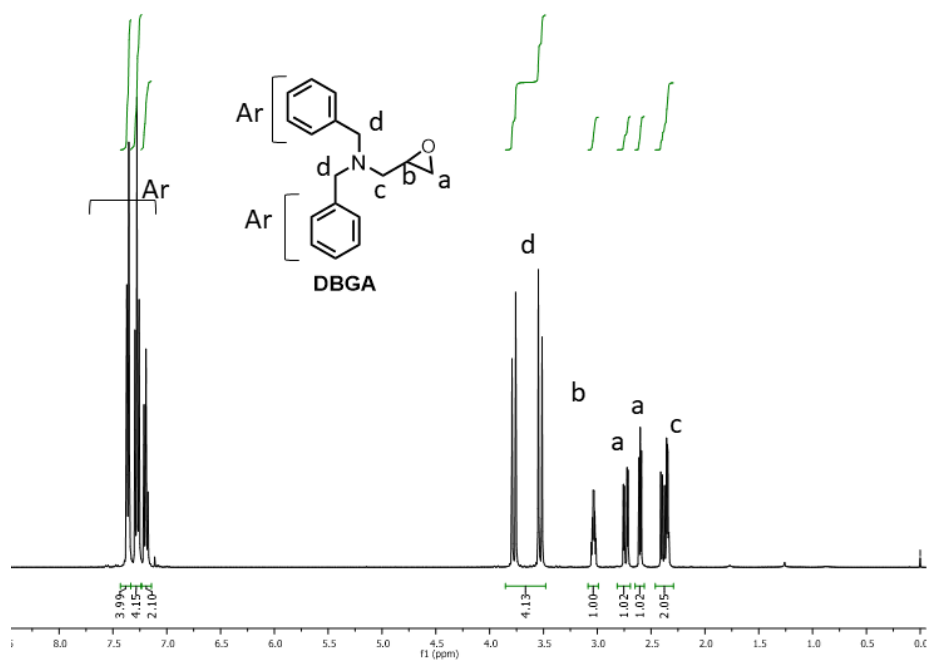

Fig-S2. <sup>13</sup>C NMR *N,N*-dibenzyl glycidylamine (DBGA)

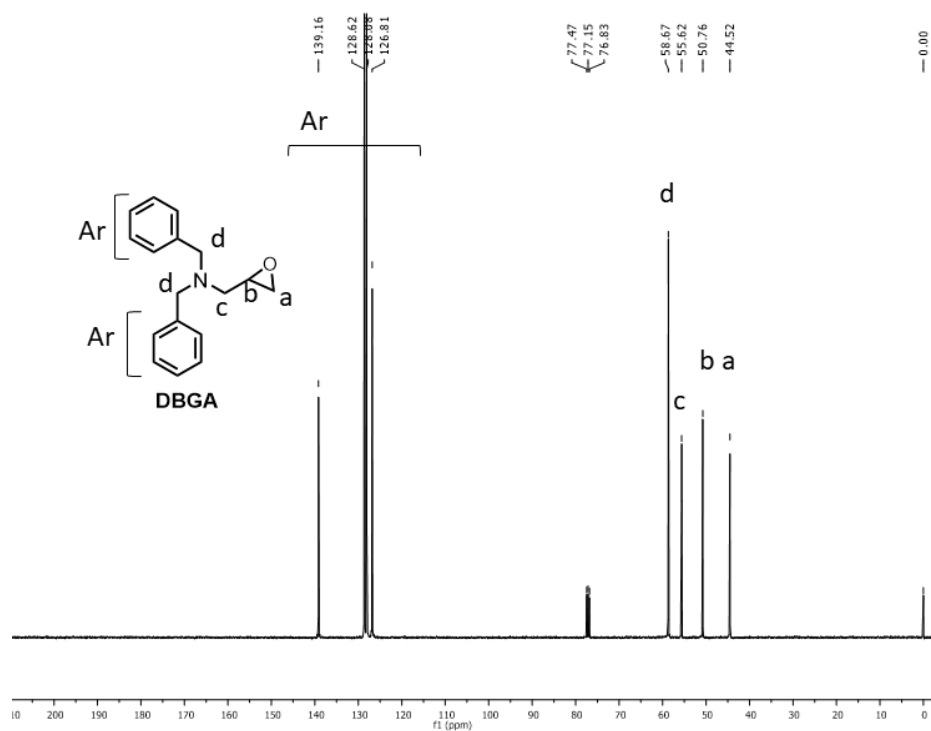

Fig-S3. <sup>1</sup>H NMR of 5-((dibenzylamino)methyl)-1,3-oxathiolane-2-thione (1)

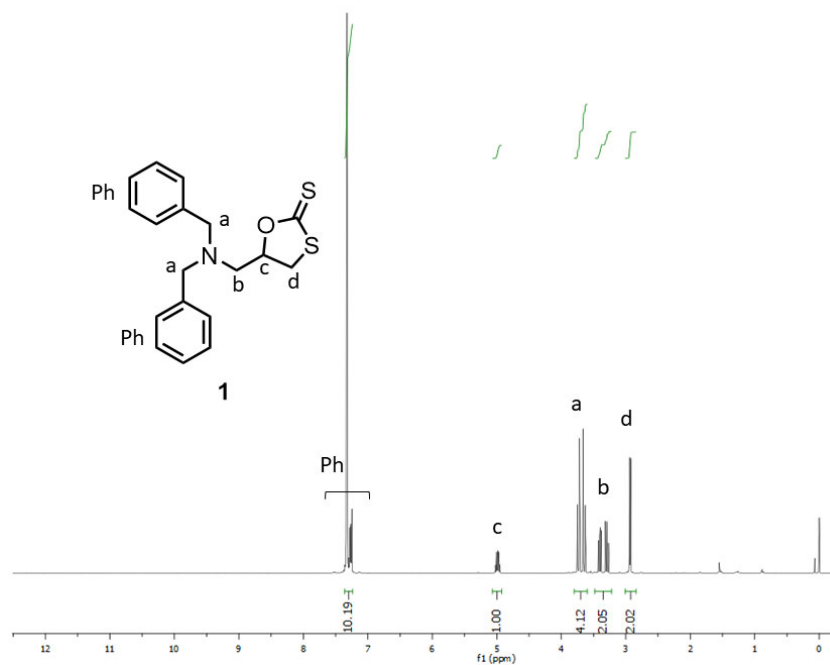

Fig-S4. <sup>13</sup>C NMR of 5-((dibenzylamino)methyl)-1,3-oxathiolane-2-thione (1)

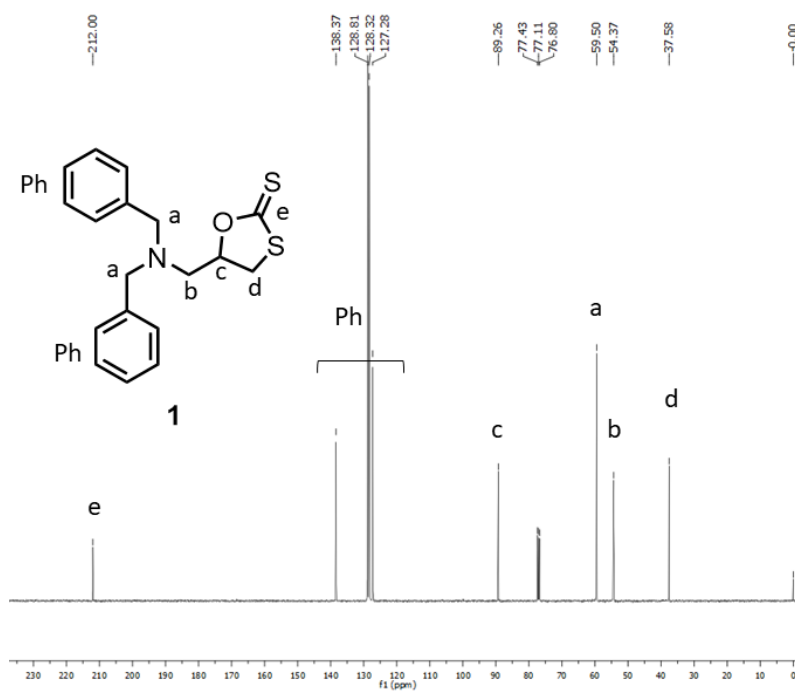

Fig-S5.  $^1\text{H}$  NMR of 5-((diethylamino)methyl)-1,3-oxathiolane-2-thione (4)

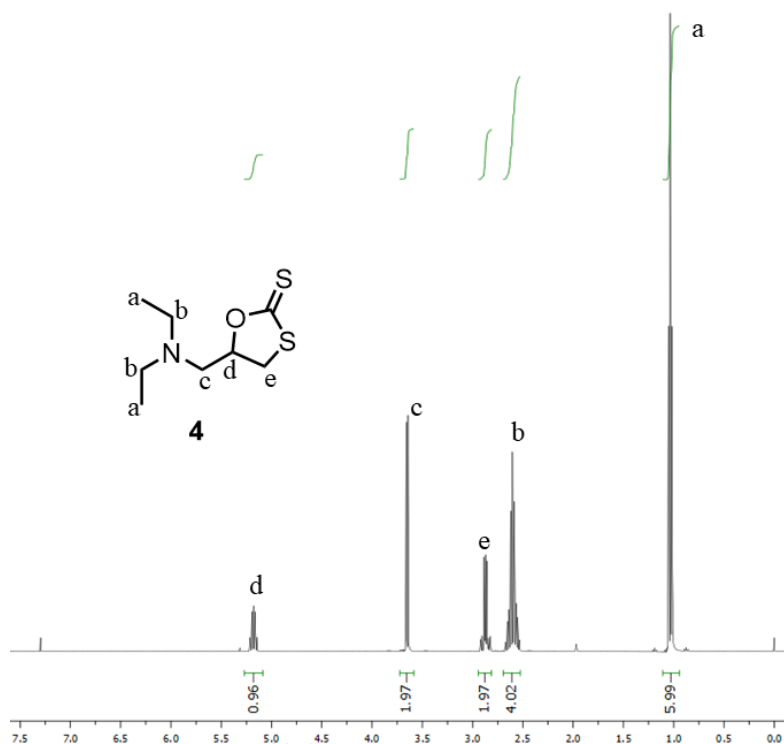

Fig-S6.  $^{13}\text{C}$  NMR of 5-((diethylamino)methyl)-1,3-oxathiolane-2-thione (4)

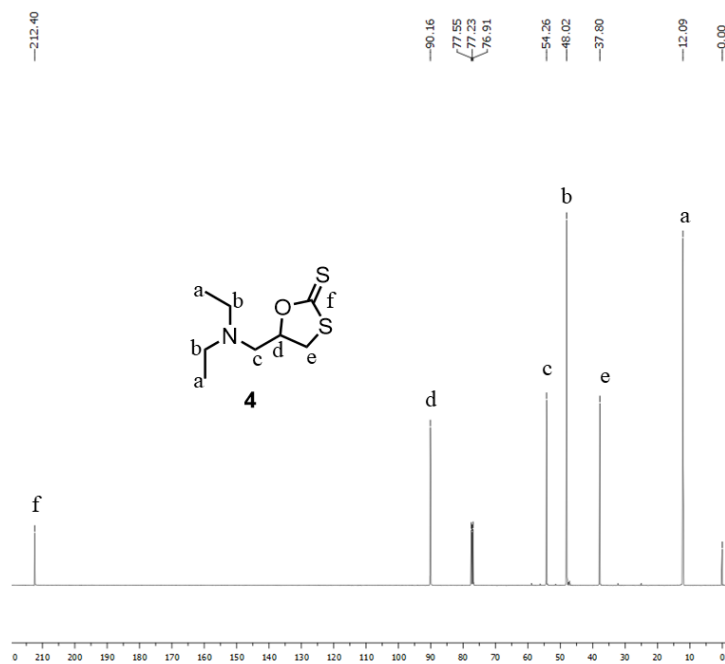

Fig-S7. <sup>1</sup>H NMR of Poly-1

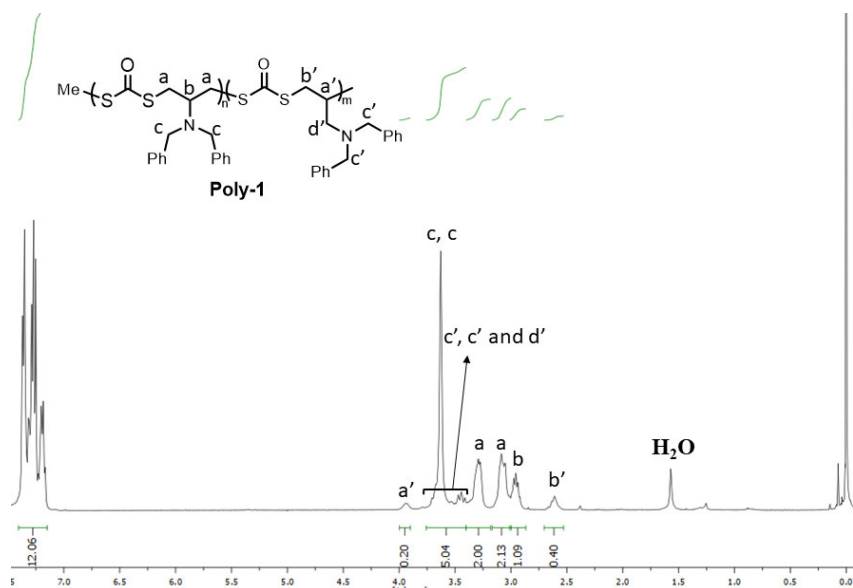

Fig-S8. <sup>13</sup>C NMR of Poly-1

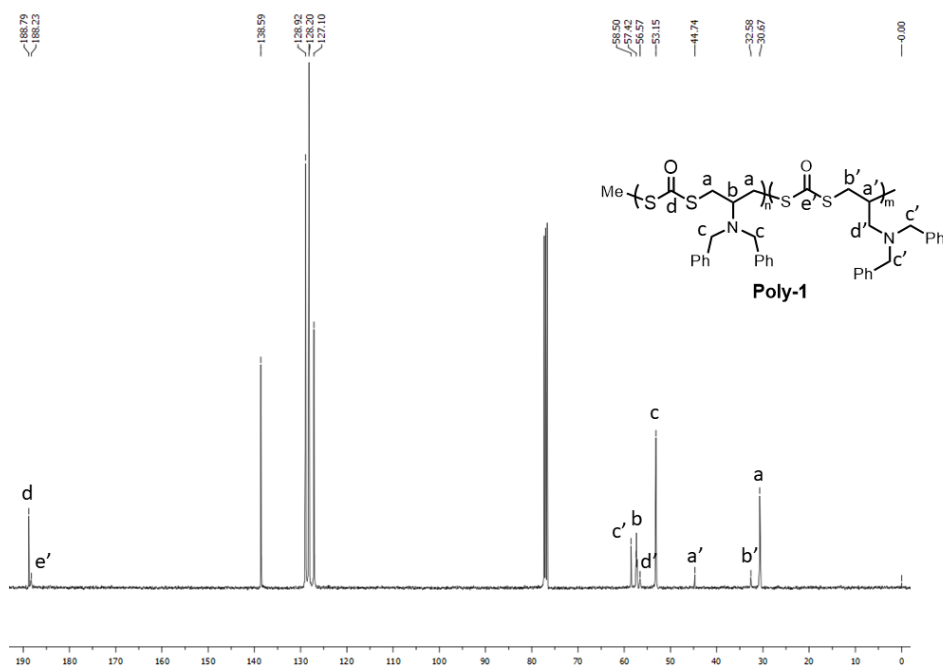

Fig-S9. DEPT135 of Poly-1

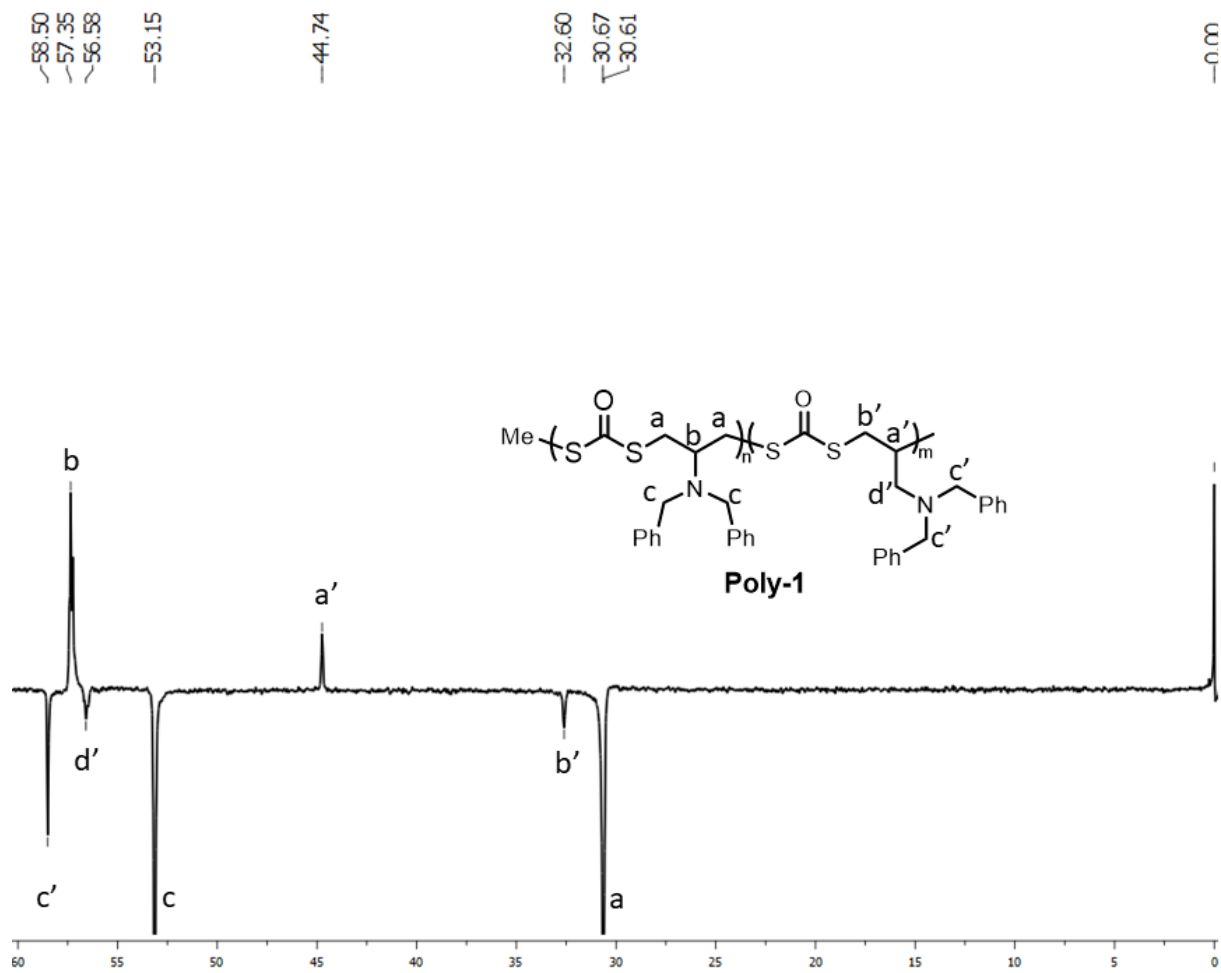

Fig-S10. <sup>1</sup>H NMR of polymerization solution of 4

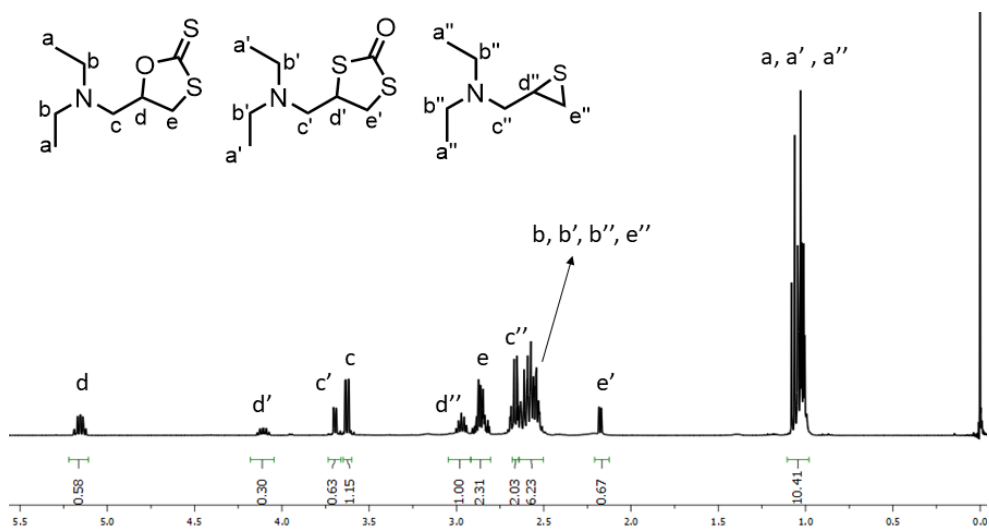

Fig-S11. <sup>13</sup>C NMR of polymerization solution of 4

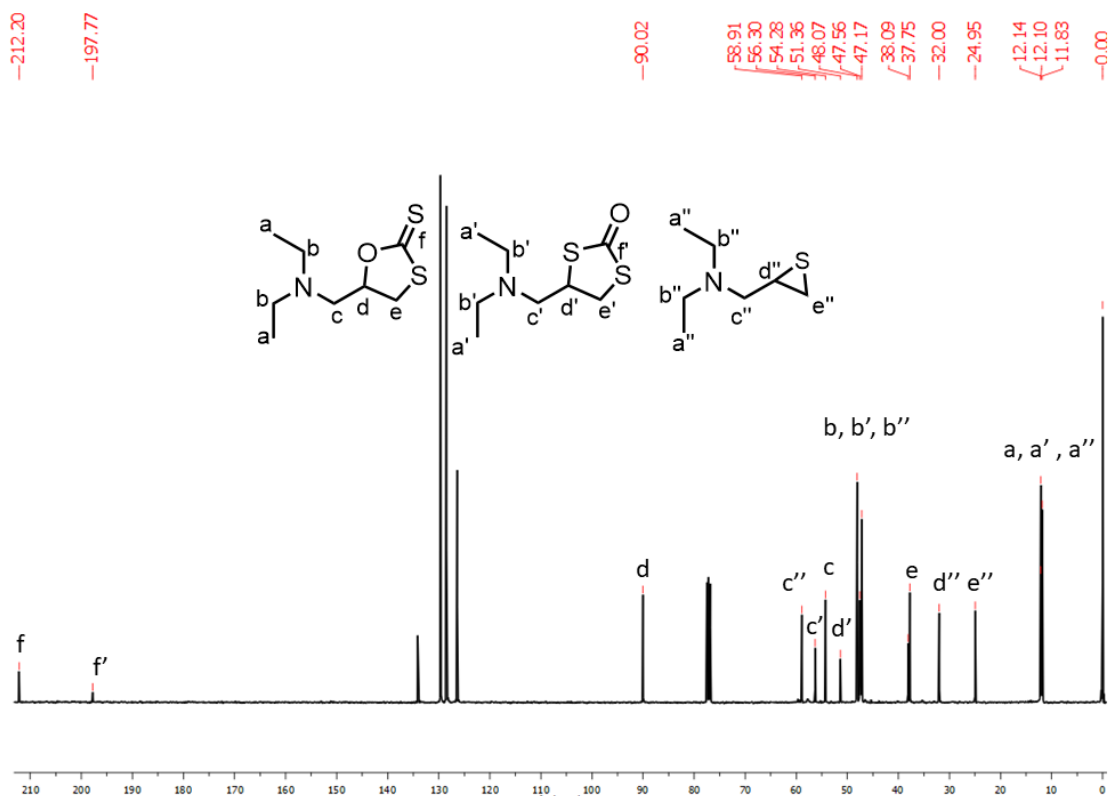

Fig-S12. DEPT-135 of polymerization solution of 4

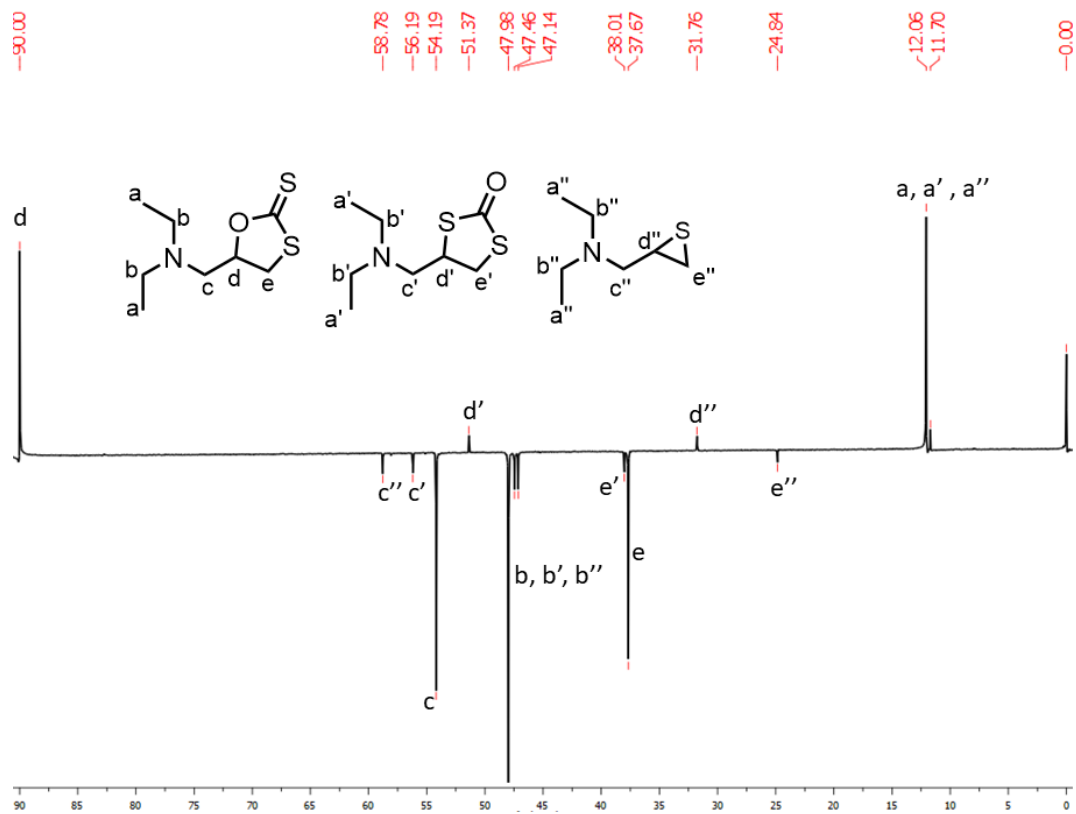



**Fig-S13.**  $^1\text{H}$  NMR of stoichiometric reaction of 5-((dibenzylamino)methyl)-1,3-oxathiolane-2-thione (**1**) with MeOTf

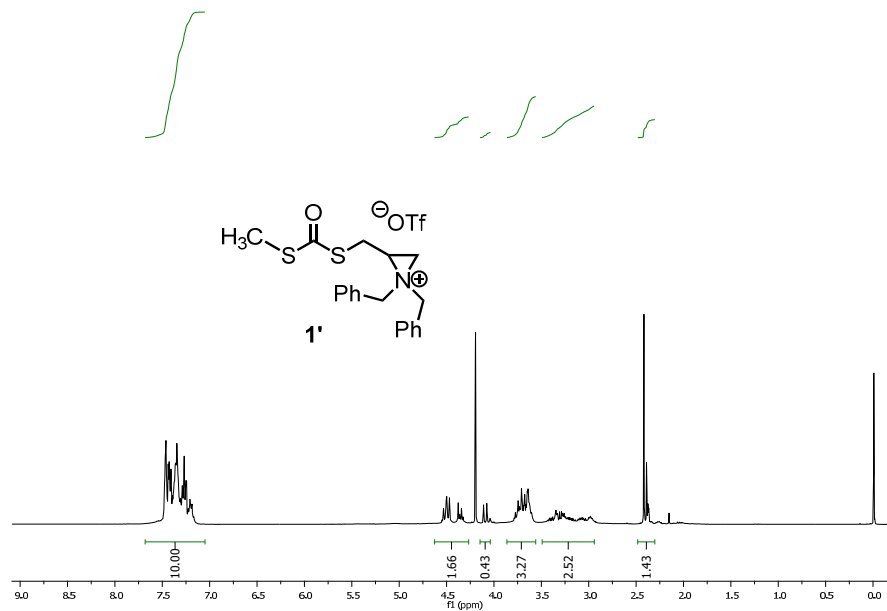

**Fig-S14.**  $^{13}\text{C}$  NMR of stoichiometric reaction of 5-((dibenzylamino)methyl)-1,3-oxathiolane-2-thione (**1**) with MeOTf

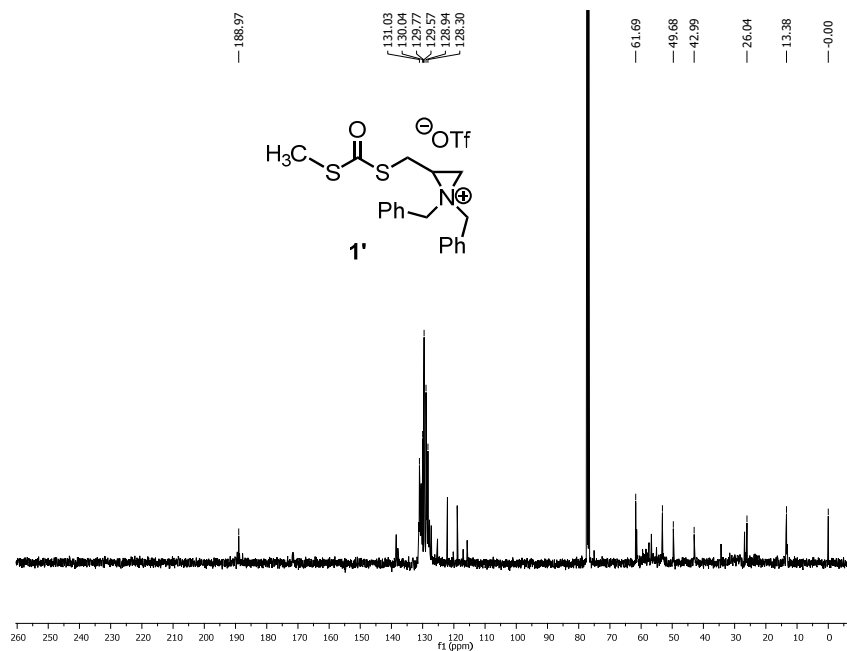

Fig-S15 <sup>1</sup>H NMR of *N,N,N*-tribenzyl-*N*-methyl ammonium triflate

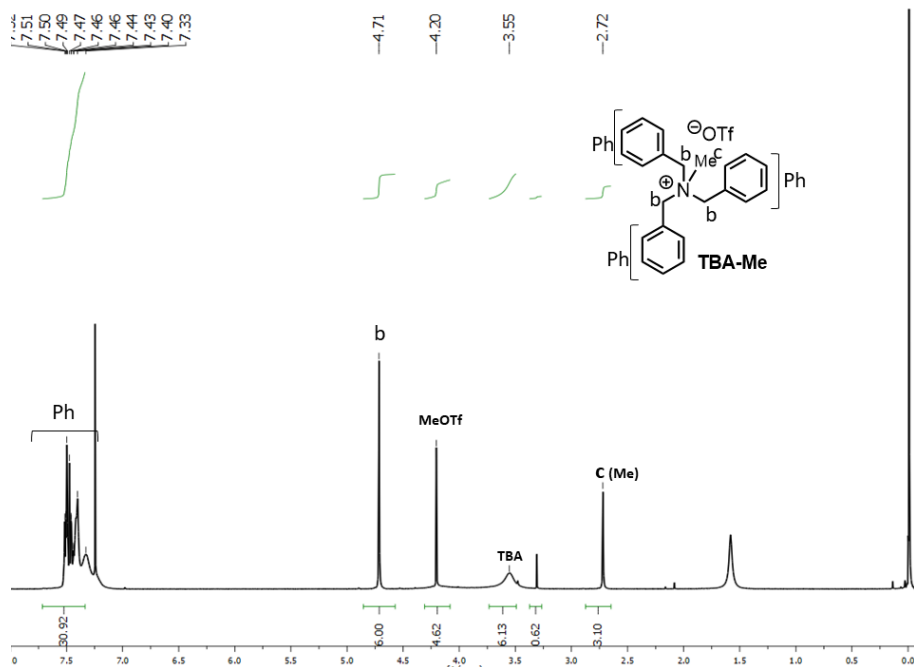

Fig-S16 <sup>13</sup>C NMR of *N,N,N*-tribenzyl-*N*-methyl ammonium triflate

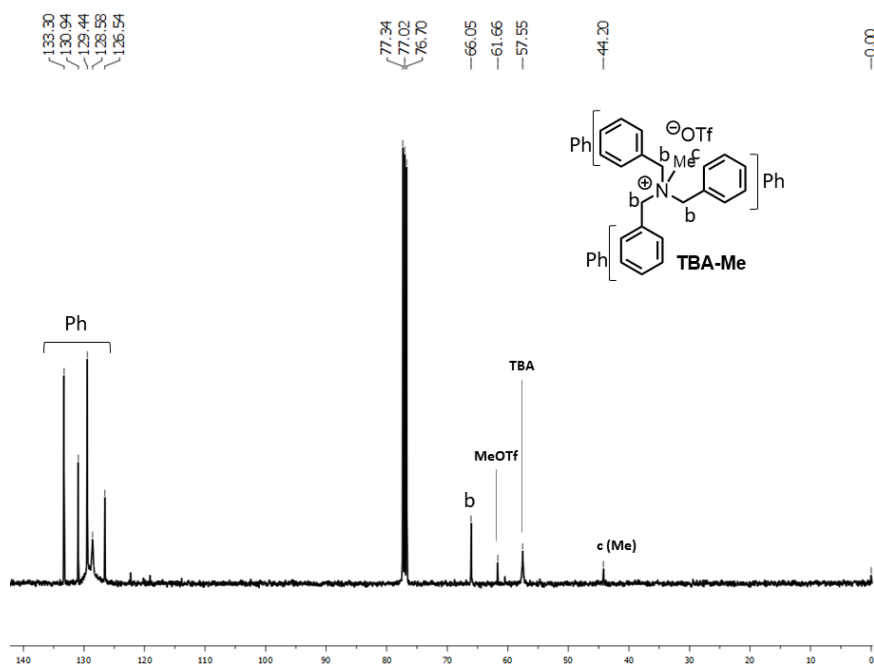

Fig-S17  $^1\text{H}$  NMR of *N,N,N*-triethyl-*N*-methyl ammonium triflate

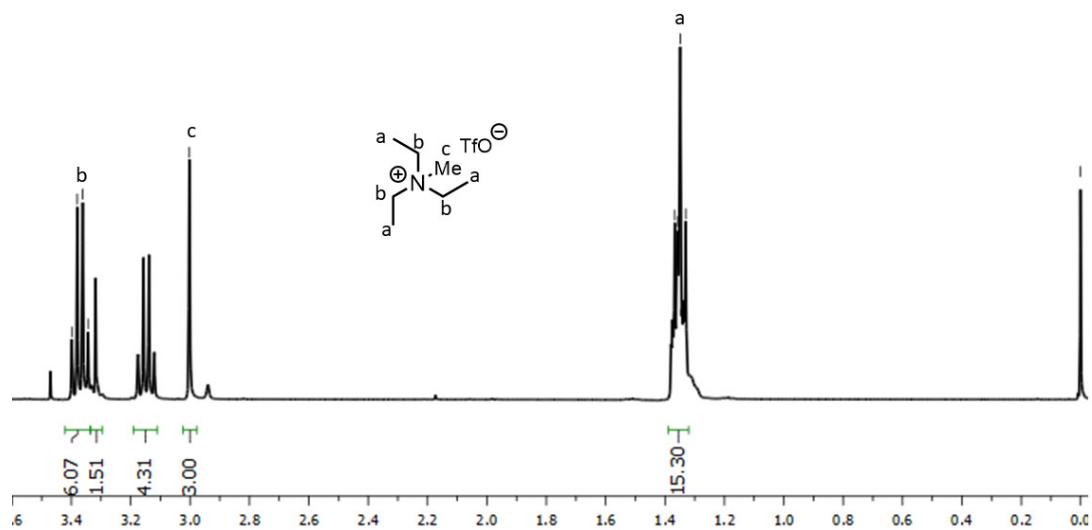

Fig-S18  $^{13}\text{C}$  NMR of *N,N,N*-triethyl-*N*-methyl ammonium triflate

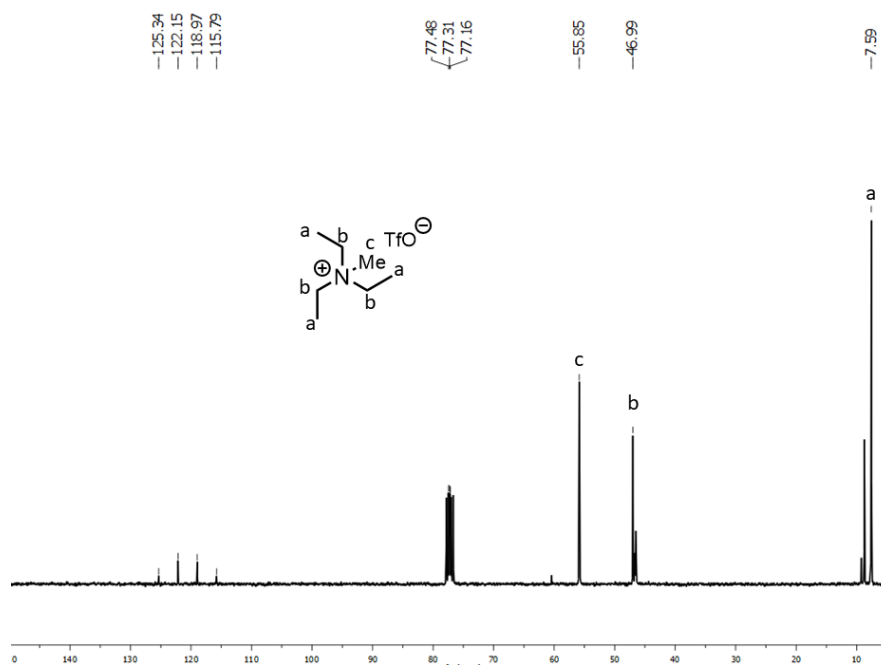

**Fig-S19.** Positive FAB Mass Spectra of 5-((dibenzylamino)methyl)-1,3-oxathiolane-2-thione (**1**) ( $[M+H]^+ = 330$ )

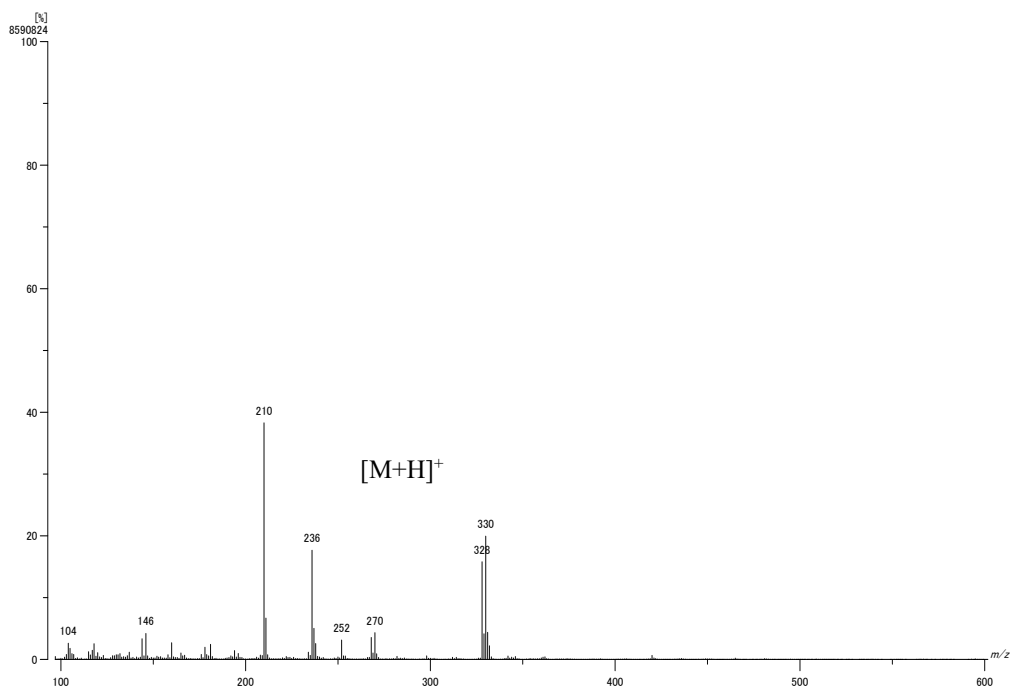

**Fig-S20.** Positive FAB Mass Spectra of 5-((diethylamino)methyl)-1,3-oxathiolane-2-thione (**4**) ( $[M+H]^+ = 206$ )

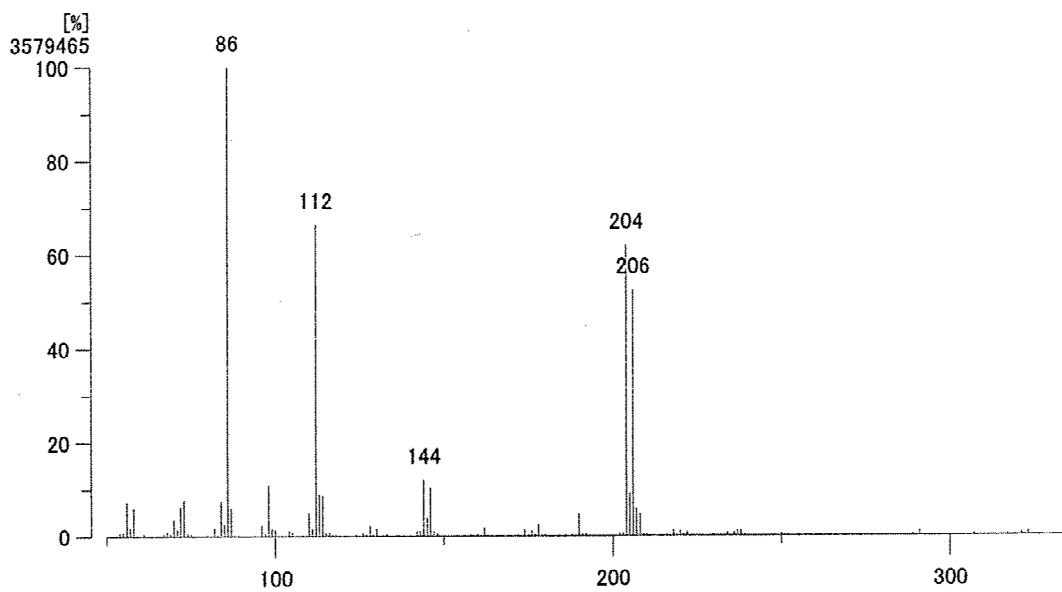

**Fig-S21. IR Spectra of 5-((dibenzylamino)methyl)-1,3-oxathiolane-2-thione (1)**

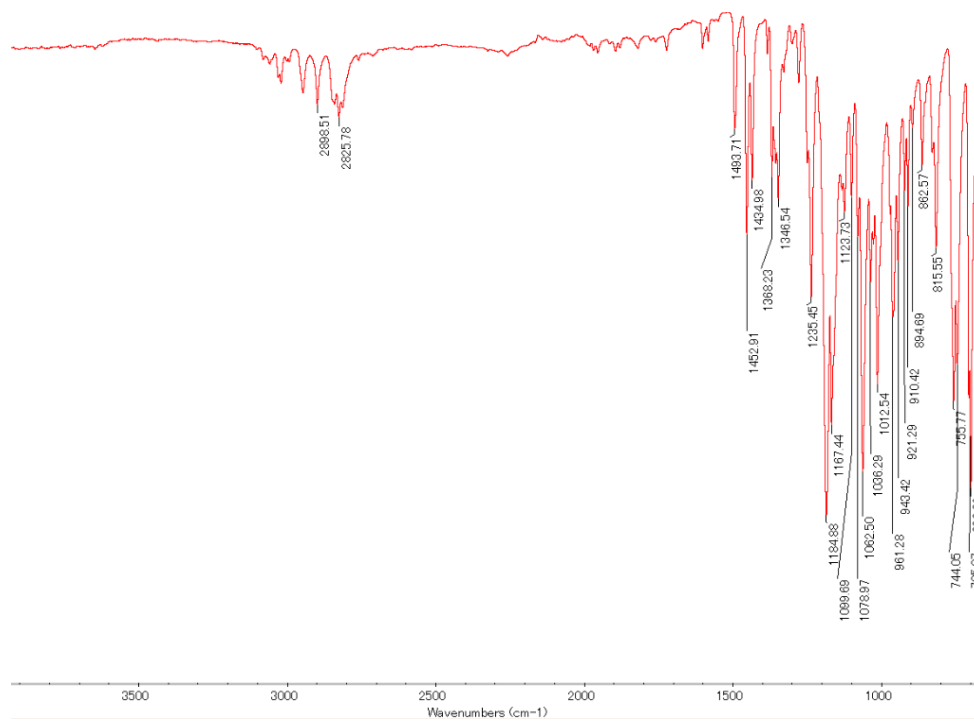

**Fig-S22. IR Spectra of Poly-1**

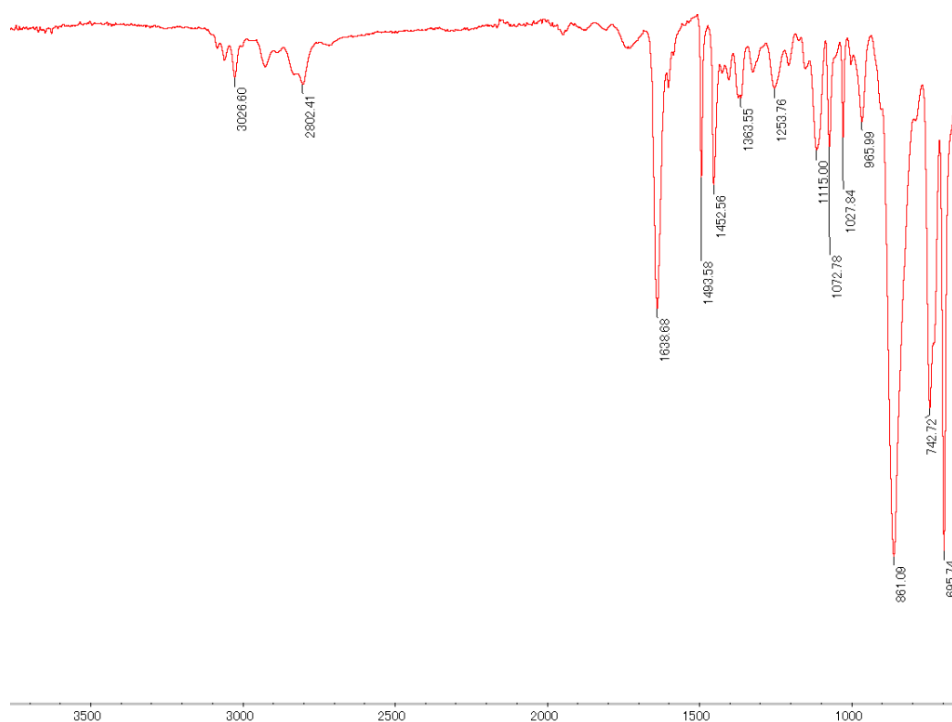

**Fig-S23.** IR Spectra of 5-((diethylamino)methyl)-1,3-oxathiolane-2-thione (4)

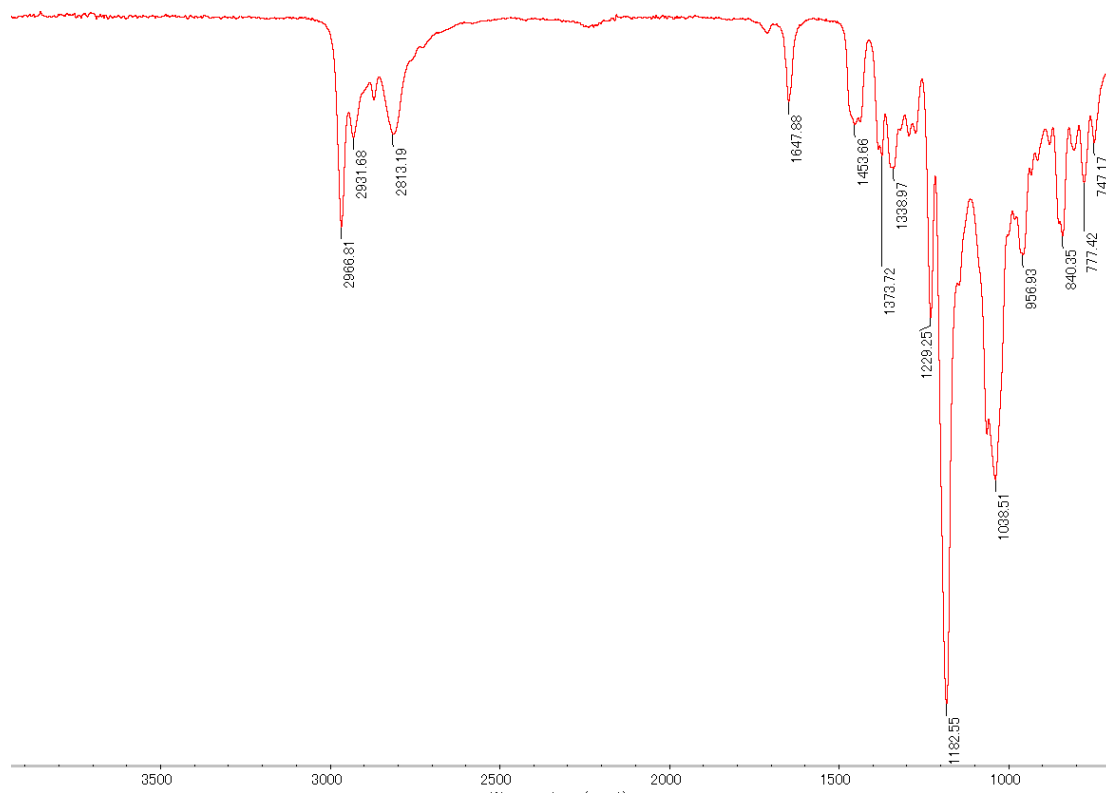

**Fig-S24.** Thermogravimetric analysis of **Poly-1**

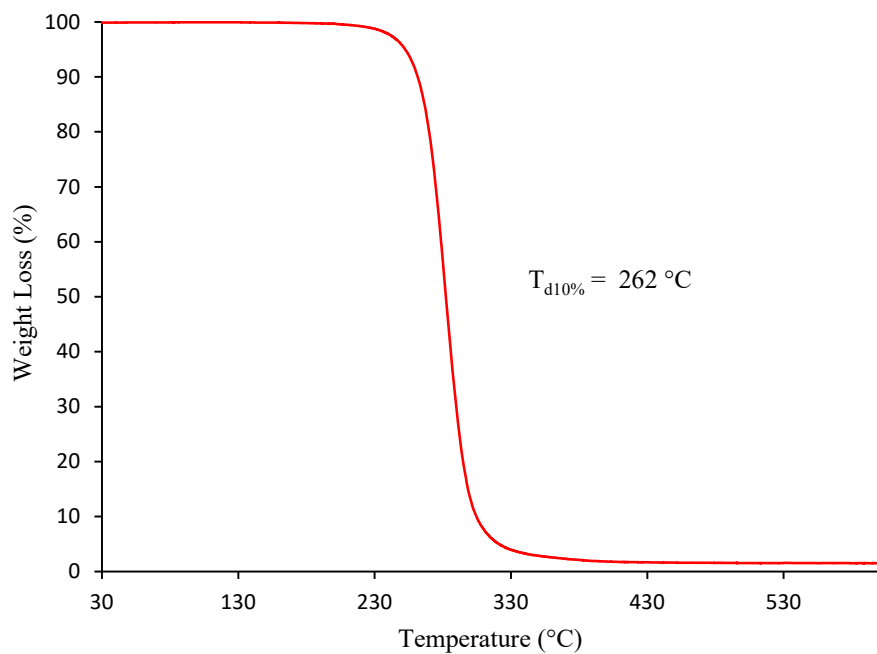

**Fig-S25.** Differential scanning calorimetry of **Poly-1**

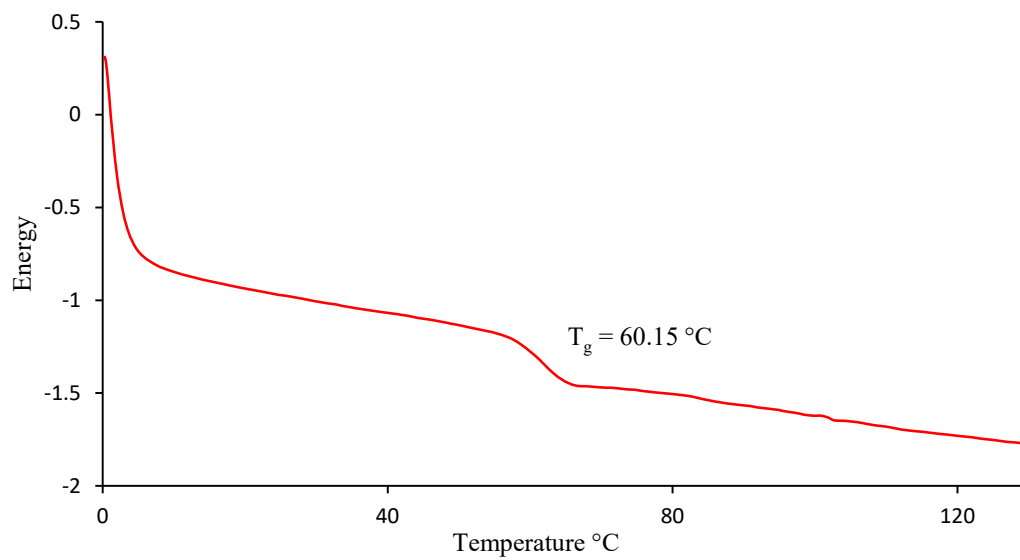

**Table 1. Crystal data and structure refinement for 5-((dibenzylamino)methyl)-1,3-oxathiolane-2-thione (1)**

|                                             |                                                                              |
|---------------------------------------------|------------------------------------------------------------------------------|
| Identification code                         | <b>5-((dibenzylamino)methyl)-1,3-oxathiolane-2-thione (1)</b>                |
| Empirical formula                           | C <sub>18</sub> H <sub>19</sub> N <sub>1</sub> O <sub>1</sub> S <sub>2</sub> |
| Formula weight                              | 329.46                                                                       |
| Temperature/K                               | 90                                                                           |
| Crystal system                              | orthorhombic                                                                 |
| Space group                                 | P2 <sub>1</sub> 2 <sub>1</sub> 2 <sub>1</sub>                                |
| a/Å                                         | 8.4425(4)                                                                    |
| b/Å                                         | 10.2492(3)                                                                   |
| c/Å                                         | 19.6013(8)                                                                   |
| α/°                                         | 90                                                                           |
| β/°                                         | 90                                                                           |
| γ/°                                         | 90                                                                           |
| Volume/Å <sup>3</sup>                       | 1696.08(12)                                                                  |
| Z                                           | 4                                                                            |
| ρ <sub>calc</sub> /mm <sup>3</sup>          | 1.290                                                                        |
| μ/mm <sup>-1</sup>                          | 2.841                                                                        |
| F(000)                                      | 696.0                                                                        |
| Crystal size/mm <sup>3</sup>                | 0.055 × 0.047 × 0.029                                                        |
| 2θ range for data collection                | 9.024 to 152.446°                                                            |
| Index ranges                                | -9 ≤ h ≤ 10, -12 ≤ k ≤ 8, -20 ≤ l ≤ 24                                       |
| Reflections collected                       | 9646                                                                         |
| Independent reflections                     | 3384[R(int) = 0.0222]                                                        |
| Data/restraints/parameters                  | 3384/0/199                                                                   |
| Goodness-of-fit on F <sup>2</sup>           | 1.072                                                                        |
| Final R indexes [I ≥ 2σ(I)]                 | R <sub>1</sub> = 0.0243, wR <sub>2</sub> = 0.0624                            |
| Final R indexes [all data]                  | R <sub>1</sub> = 0.0257, wR <sub>2</sub> = 0.0630                            |
| Largest diff. peak/hole / e Å <sup>-3</sup> | 0.18/-0.18                                                                   |
| Flack parameter                             | 0.056(6)                                                                     |



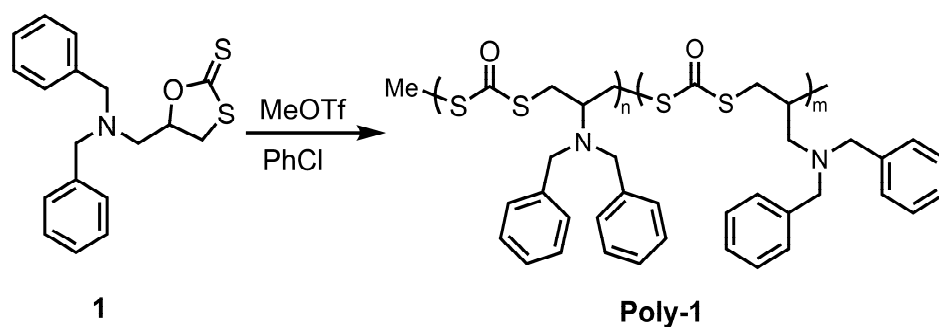

***Time-Conversion study of Cationic Polymerization of 5-((dibenzylamino)methyl)-1,3-oxathiolane-2-thione (1) to Poly-1 at room temperature***

To a solution of **1** (0.329 g, 1.0 mmol) in chlorobenzene (1.0 mL) was added MeOTf (5 mol%, 5  $\mu$ L;  $[\mathbf{M}]_0/[\mathbf{I}]_0 = 20$ ) and stirred at ambient temperature. To measure the conversion at 30 min, 1h, 2h, 3h, 4h and 6h an aliquot was taken quenched with TEA, then  $^1\text{H}$  NMR and GPC of the sample was measured to determine the conversion and molar mass ( $M_n$ ) respectively.

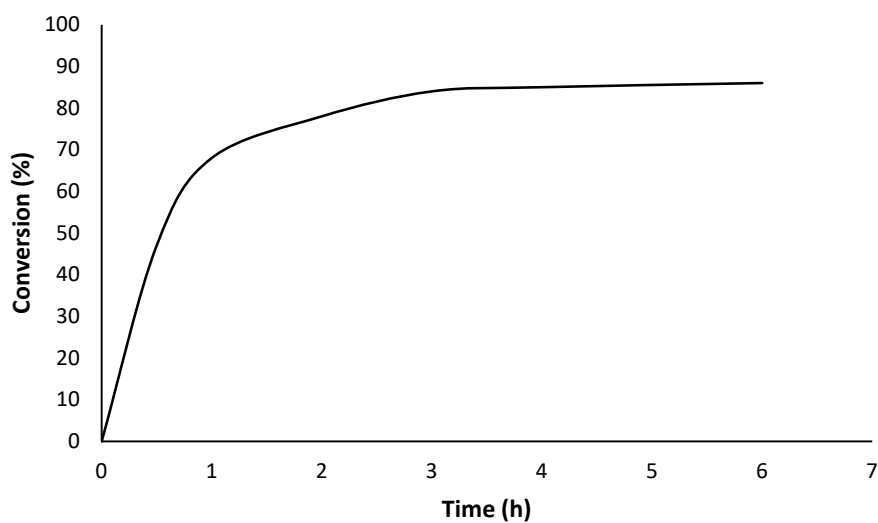

**Figure S26:** Time-conversion plot for the polymerization of 5-((dibenzylamino)methyl)-1,3-oxathiolane-2-thione (**1**) with MeOTf in chlorobenzene (1.0 M) at 30 °C, ( $[\mathbf{1}]_0/[\text{MeOTf}]_0 = 20.0$ )

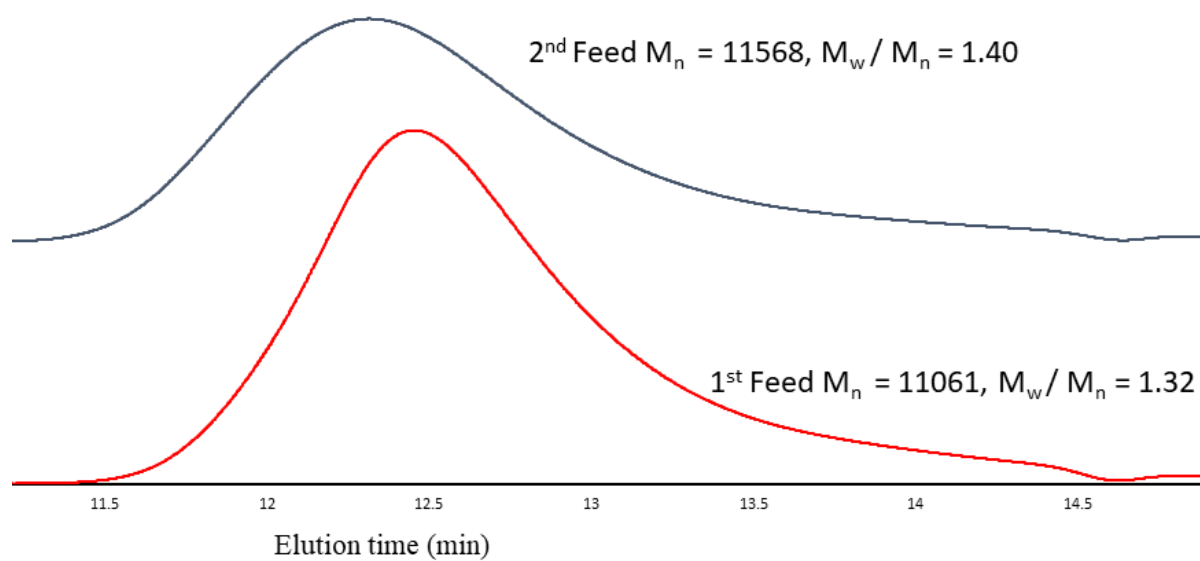

**Figure S27.** SEC profiles before and after the post-polymerization experiment of **1** to Poly-**1**: first-stage polymerization,  $M_n = 11061$ ,  $M_w/M_n = 1.32$ ; Poly-**1**: post polymer obtained in the second stage polymerization,  $M_n = 11568$ ,  $M_w/M_n = 1.40$

\*\*\*\*\*End\*\*\*\*\*
